# Supplementary material
Source: PubMed Central journal article supplement (PMC8012164)
Supplement: mmc1.pdf [file mmc1.pdf]

**Table S1.** Risk of bias assessment results of the nine articles selected (QUIPS tool).

| Study # | Study Participation | Study Attrition | Prognostic Factor Measurement | Outcome Measurement | Study Confounding | Statistical Analysis and Reporting | Overall |
|---------|---------------------|-----------------|-------------------------------|---------------------|-------------------|------------------------------------|---------|
| 1       | +                   | +               | +                             | +                   | +                 | +                                  | +       |
| 2       | +                   | +               | +                             | +                   | +                 | +                                  | +       |
| 3       | +                   | +               | +                             | +/-                 | ?                 | +                                  | +       |
| 4       | +/-                 | -               | +                             | +/-                 | ?                 | ?                                  | +/-     |
| 5       | +                   | -               | +                             | +                   | ?                 | ?                                  | +/-     |
| 6       | +/-                 | +               | +                             | +/-                 | +                 | ?                                  | +/-     |
| 7       | +                   | +               | +                             | +                   | ?                 | +                                  | +       |
| 8       | +                   | +/-             | +                             | +                   | ?                 | ?                                  | +       |
| 9       | +                   | +               | +                             | +                   | ?                 | +                                  | +       |
| 10      | +                   | +               | +                             | +                   | +                 | +                                  | +       |
| 11      | +                   | +               | +                             | +                   | ?                 | ?                                  | +       |
| 12      | +                   | +/-             | +                             | +                   | ?                 | +                                  | +       |
| 13      | +                   | +               | +                             | +                   | ?                 | +                                  | +       |
| 14      | +                   | +               | +                             | +/-                 | ?                 | +                                  | +       |
| 15      | +                   | +               | +                             | +                   | ?                 | +                                  | +       |
| 16      | +/-                 | +/-             | +/-                           | +                   | +                 | +                                  | +/-     |
| 17      | +                   | +               | +                             | +                   | ?                 | +                                  | +       |
| 18      | +                   | +               | +                             | +                   | ?                 | ?                                  | +       |
| 19      | +                   | +               | +                             | +                   | ?                 | ?                                  | +       |
| 20      | +                   | +               | +                             | +                   | ?                 | ?                                  | +       |
| 21      | +                   | +               | +/-                           | +/-                 | ?                 | ?                                  | +/-     |
| 22      | +                   | +               | +                             | +                   | ?                 | +                                  | +       |
| 23      | +                   | +               | +                             | +                   | ?                 | +                                  | +       |
| 24      | +                   | +               | +                             | +                   | ?                 | +                                  | +       |
| 25      | +                   | +/-             | +                             | +                   | ?                 | +                                  | +       |
| 26      | +                   | +               | +                             | +                   | ?                 | +                                  | +       |
| 27      | +                   | +               | +                             | +                   | +                 | +                                  | +       |
| 28      | +                   | +               | +/-                           | +                   | +                 | +                                  | +       |
| 29      | +                   | +               | +                             | +                   | +                 | ?                                  | +       |

(+) High quality, (+/-) Acceptable, (-) Low quality, (?) Unsure
