# Supplementary material
Source: PubMed Central journal article supplement (PMC8012164)
Supplement: mmc2.pdf [file mmc2.pdf]

**Table S2. Summary of the samples and methodologies used for each study.**

| Study # | Type of data/biological samples                                                                                                                                                                                                                               | Methodology                                                                                                                                                                                                                                                                                                                                     |
|---------|---------------------------------------------------------------------------------------------------------------------------------------------------------------------------------------------------------------------------------------------------------------|-------------------------------------------------------------------------------------------------------------------------------------------------------------------------------------------------------------------------------------------------------------------------------------------------------------------------------------------------|
| 1       | Lung protein data from the HPRD, Human Proteome Map, Proteomics DB and Human Protein Atlas                                                                                                                                                                    | SARS-CoV and host protein Interaction: Affinity purification mass spectrometry (AP-MS)<br>Human protein-protein interaction: Human Proteinpedia, BioGRID, HPRD and Intact database.<br>GO/Pathway analysis: KEGG and NCBI Gene Expression Omnibus GEO                                                                                           |
| 2       | SARS-CoV-2 (China, Italy, Spain), MERS, SARS, OC43, and 229E genome sequences from NCBI database<br>SARS-CoV-2 sequences from GISAID database (England and Turkey),<br>Vero E6 cells sequence infected with SARS-CoV-2 strain isolated from a Turkish patient | Target prediction: miRTarget and miRbase<br>GO/Pathway analysis: DianaTools miRPath V3, Rosalind, topGO R library, Interpro, NCBI, MSigDB, REACTOME, WikiPathways<br>Mutational analysis of potential miRNA sites: Clustal Omega at EBI                                                                                                         |
| 3       | SARS-CoV-2 RNA sequences obtained from NCBI (MTO49951.1)<br>Normal lung squamous cells and lung tissue miRNA expression through TCGA-Assembler 2 package (R software)                                                                                         | Virus information: Viral Zone<br>miRNA sequences: miRbase<br>host miRNA and viral genome affinity: RNAhybrid database<br>Selection of efficient miRNAs and transcriptional factors: mirWalk, TransmiR<br>Pathway analysis: KEGG database, Biorender, Cytoscape<br>Modeling analysis: SWISS-MODEL modeling tools<br>Herb phytochemicals: PubChem |
| 4       | SARS-CoV-2 sequences from NCBI database<br>Liquid bronchoalveolar lavage fluid samples                                                                                                                                                                        | Target prediction: miRbase ORF Identification: GeneMark and ORF Finder<br>Homology search: BLAST<br>Pattern/Motif recognition: SMART<br>Epitope analysis: IEDB<br>Protein secondary structure prediction: SPLIT 4.0<br>3D structure modeling: SWISS-MODEL, I-TASSER<br>Drug prediction: Drugbank and SeeSAR                                     |
| 5       | Four SARS and 29 COVID-19 sequences from NCBI and GISAID database                                                                                                                                                                                             | Target prediction: miRDB<br>GO/Pathway analysis: DIANA tools miRPath v 3.0                                                                                                                                                                                                                                                                      |
| 6       | Wuhan-Hu-1 full genome sequences<br>ssRNA spike in glycoprotein (YP_009724390) from Jordanian positive nasopharyngeal specimens (Biolab Diagnostic Laboratories and Andersen Lab at Scripps Research)                                                         | Target prediction: miRDB, MirTarget<br>Conversion of miRNA to DNA: <a href="http://biomodel.uah.es/en/lab/cybertory/analysis/trans.htm">http://biomodel.uah.es/en/lab/cybertory/analysis/trans.htm</a><br>Sequence alignment: ChromosPros Version 2.1.9                                                                                         |
| 7       | High confidence mass spectrometry-based SARS-CoV-2 viral protein to human protein interaction network established by Gordon <i>et al.</i> , (2020) in HEK293 cells.<br>RNA sequencing data deposited in Gene Expression Omnibus (GEO)                         | Sequence alignment: FASTX-Toolkit, HISAT, SAMtools, StringTie<br>Differential expression: DE-seq2<br>Functional enrichment analysis: ClueGO, Cytoscape<br>Alternative splicing events: rMATS<br>RBP motifs: ATtRACT, FIMO<br>miRNA motifs: MEME-suite, FIMO<br>miRNA expression profile: FANTOM5                                                |
| 8       | SARS-CoV-2 genome sequences from GISAID from Asia, Europe, Oceania, North America, South America and Africa                                                                                                                                                   | Target prediction: RNA22 v2<br>Sequence Alignment: EMBL-EBI<br>Prediction of human RBP binding: RBPmap<br>Validation of RBP and miRNA expression: The Protein Atlas, RNAseq, CAGE, FANTOM5, GEPIA                                                                                                                                               |
| 9       | 7 Viral genomes downloaded from the NCBI Virus<br>miRNAseq data from TCGA-LUAD                                                                                                                                                                                | Target prediction: miRDB v 6.0, TargetScan v 7.2, miRTarBase v.8<br>Sequence Alignment: MSA<br>GO/Pathway analysis: DIANA miRPath v 3.0                                                                                                                                                                                                         |

|    |                                                                                                                                                                                                                                                                                                                                                                   |                                                                                                                                                                                                                                                                                                                                                                                                                                                                                       |
|----|-------------------------------------------------------------------------------------------------------------------------------------------------------------------------------------------------------------------------------------------------------------------------------------------------------------------------------------------------------------------|---------------------------------------------------------------------------------------------------------------------------------------------------------------------------------------------------------------------------------------------------------------------------------------------------------------------------------------------------------------------------------------------------------------------------------------------------------------------------------------|
|    | miRNAseq GSE36971 and GSE90624 for SARS-CoV-2 infected mouse lungs                                                                                                                                                                                                                                                                                                | MiRNA Expression: miRDeep2, DESeq2                                                                                                                                                                                                                                                                                                                                                                                                                                                    |
| 10 | For miRNA target prediction: Reference genomes for SARS-CoV (NC_004718.3), MERS-CoV (NC_019843.3), and SARS-CoV-2 (NC_045512.2) from GenBank<br>For miRNA expression: 46 matched “normal” lung tissue miRNA-Seq expression dataset from the TCGA-LUAD project, and Calu3cells post-infection miRNA-sequencing data (SARS-Cov-2 and mock infection) from GSE148729 | Target prediction: TargetScan v 7.2, RNA22 v 2<br>Differential expression: edgeR                                                                                                                                                                                                                                                                                                                                                                                                      |
| 11 | SARS-CoV2 genome sequences from GISAID database<br>SARS-CoV and MERS genome sequences from NCBI database                                                                                                                                                                                                                                                          | Target prediction: miRanda v 3.3<br>Gene annotation and protein sequences: ViPR<br>Mutation analysis: Genome Detective Coronavirus Subtyping Tool, I-MUTANT, MuPro<br>Host antiviral miRs identification: miRBase, VIRmiRNA<br>Post-translational modifications prediction: NetOglyc 4.0, NetNfly 1.0, Net-Corona 1.0, CSS-Palm 2.0<br>Antiviral peptides prediction: AVPpred<br>Host gene expression analysis: NCBI GEO database                                                     |
| 12 | 67 whole-genome sequences of SARS-CoV-2 isolates covering 24 different countries from NCBI database                                                                                                                                                                                                                                                               | Target prediction of hosts miRNAs: Funrich, miRTarBase<br>miRNA sequences: miRbase<br>Human 3’UTR sequences: Ensembl-Biomart<br>Prediction of viral pre-miRNA: miRNAfold, RNAfold, FOMmiR. iMiRNA-SSF<br>Prediction of Mature miRNA: MatureBayes<br>RNA-RNA Interaction: IntaRNA 2.0, microRNA.org, psRNATarget<br>GO/Pathway analysis: EnsEMBL, KEGG, Gitoools<br>Enrichment analysis: EnrichR, DAVID 6.8, WebGestalt 2019, FunRich 3.1.3<br>Microarray expression analysis: RNA-seq |
| 13 | Wuhan-Hu-1 isolate from NCBI database (MN908947.3)                                                                                                                                                                                                                                                                                                                | Target prediction: psRNATarget<br>miRNA sequences: miRBase<br>Pre-miRNA prediction: izMiR<br>GO analysis: PANTHER                                                                                                                                                                                                                                                                                                                                                                     |
| 14 | SARS-CoV-2 genome sequences from NCBI and GenBank                                                                                                                                                                                                                                                                                                                 | Sequence alignment: BLAST                                                                                                                                                                                                                                                                                                                                                                                                                                                             |
| 15 | SARS-CoV-2 genome sequences from NCBI                                                                                                                                                                                                                                                                                                                             | Target prediction: miRDB<br>Identification of SARS-CoV-2 pre-miRNA: Vmir v 2.3, ViralMir<br>Identification of mature miRNAs: Mature Bayes<br>GO analysis: PANTHER, Enrichr                                                                                                                                                                                                                                                                                                            |
| 16 | SARS-CoV-2 genome sequences from NCBI (China, India, USA, Italy, Jamaica)                                                                                                                                                                                                                                                                                         | Prediction of viral pre-miR: VMir<br>Prediction of human miRNA from precursor miRNA hairpin: SSEARCH, miRbase, RNA hybrid<br>Hybridization between viral pre-miRNA and human miRNA: RNA hybrid<br>Identification of mature miRNAs from pre-miRs: Mature Bayes<br>Prediction of the secondary structure of pre-miR: RNAfold<br>GO analysis: PANTHER                                                                                                                                    |
| 17 | Peripheral blood samples from ten patients with COVID-19 one week after treatment with antiviral reagents and medical support and four healthy donors.                                                                                                                                                                                                            | MiRNA prediction: miRanda<br>RNA expression: High-throughput sequencing (Illumina HiSeqX Ten PE75)<br>GO analysis: geneontology.org                                                                                                                                                                                                                                                                                                                                                   |
| 18 | RING database (integration of more than 30 publicly available data repositories)                                                                                                                                                                                                                                                                                  | Network analysis: Graph Tools (RING database: TRUUST, SIGNOR, MIRIAD, DGIb, DRUGBANK)                                                                                                                                                                                                                                                                                                                                                                                                 |

|    |                                                                                                                                                                                                                                                               |                                                                                                                                                                                                                                                                                                                                                                                                                                                                                                                                                                                                                                                                                                                                        |
|----|---------------------------------------------------------------------------------------------------------------------------------------------------------------------------------------------------------------------------------------------------------------|----------------------------------------------------------------------------------------------------------------------------------------------------------------------------------------------------------------------------------------------------------------------------------------------------------------------------------------------------------------------------------------------------------------------------------------------------------------------------------------------------------------------------------------------------------------------------------------------------------------------------------------------------------------------------------------------------------------------------------------|
|    |                                                                                                                                                                                                                                                               | Enrichment analysis: R pipeline, clusterProfiler package, GO, KEGG, Wikipathways                                                                                                                                                                                                                                                                                                                                                                                                                                                                                                                                                                                                                                                       |
| 19 | RNASeq datasets from GEO database: <a href="#">GSE147507</a> : SARS-CoV-2 infection in lung epithelium and lung alveolar cells of humans <a href="#">GSE35145</a> : eight samples including Idiopathic Pulmonary Fibrosis cells and normal tissue of the lung | Differential expression.: limma package, DESeq2, GEO2R<br>GO/Pathway analysis: WikiPathays, Reactome, BioCarta, Enrichr<br>Protein-protein interaction analysis: STRING, Cytoscape, cytoHubba, MCODE<br>TF-gene interactions: NetworkAnalyst, ENCODE<br>TF-miRNA coregulatory network: NetworkAnalyst<br>Identification of candidate drugs: DSigDB, Enrichr                                                                                                                                                                                                                                                                                                                                                                            |
| 20 | Microarray data of gene expression profile (E-MTAB-8871) from ArrayExpress: 22 SARS-CoV-2-infected samples and 10 normal control samples                                                                                                                      | Differential expression: limma package<br>Pathway enrichment analysis: BIOCYC, KEGG, Pathway Interaction Database, REACTOME, GenMAPP, MSigDB C2 BIOCARTA, PantherDB, PathwayOntology, Small Molecule Pathway Database, ToppGene(ToppFun)<br>GO Anakysis:ToppGene (ToppFun)<br>PPI network analysis: STRING, Cytoscape<br>Target gene-miRNA regulatory network: miRNet<br>Target-gene-TF regulatory network: NetworkAnalyst, JASPAR, Cytoscape 3.8.0                                                                                                                                                                                                                                                                                    |
| 21 | Nasopharyngeal and oropharyngeal swabs from positive cases of SARS-CoV-2                                                                                                                                                                                      | Viral genome sequencing: MiSeq system (Illumina), CLC Genomics Workbench v20.0.3<br>Phylogenetic Analysis: IQTREE<br>Structural and function impact of mutations: STArMir, dBDEMC2, TissueAtlas                                                                                                                                                                                                                                                                                                                                                                                                                                                                                                                                        |
| 22 | SARS-CoV-2 reference sequences from NCBI (NC_045512.2) and other 65 sequences from NCBI and GISAD databases                                                                                                                                                   | Mutation analysis: SNAP v2.1.1, RNAsnp<br>Impact of mutations on RNA secondary structure: RNAfold, RNAalifold, MutaRNA, RNAsnp),<br>Potential miRNA Site Analysis RegRNA2.0, miRDB<br>Potential Splice Site Analysis: RegRNA2.0, HSF, NIPU                                                                                                                                                                                                                                                                                                                                                                                                                                                                                             |
| 23 | Human ACE2 gene and peptide sequence was obtained from the NCBI and Uniprot database, respectively                                                                                                                                                            | Identification of miRNAs targeting ACE2: miRWalk, miRDB<br>Physicochemical characterization: ProtParam (ExPASy), SignalP-4.1, Protscale server<br>SNP analysis: BioMuta v4.0, dbSNP, SIFT, PolyPhen-2, PROVEAN, PANTHER<br>Subcellular localization: CELLO, TMHMM, HMMTOP, UniProt<br>Methylation sites assessment: MethyCancer<br>Post translational modification assessment: NetCGlyc1.0, NetCorona 1.0, NetOGlyc 1.0, NetGlycate 1.0, NetPhos3.1, NetNGlyc 1.0, ProP 1.0<br>Functional networks for protein associations: STRING<br>Protein structure building: Swiss Model<br>Tfs of ACE2: NCBI database<br><br>RNA sequencing data of lung biopsy samples: GEO database, limma, edgeR, gplots, org.Hs.eg.db, TcolorBrewer, Glimma |
| 24 | Neonatal rat cardiomyocytes and fibroblasts (data not used in this Review)<br>Human-induced pluripotent stem cell-derived cardiomyocytes, fibroblasts and endothelial cells                                                                                   | Target prediction: TargetScan<br>Modulation of miRNA levels: Transfection, RT-qPCR, Luciferase reporter assay, Western Blot                                                                                                                                                                                                                                                                                                                                                                                                                                                                                                                                                                                                            |
| 25 | Large airway epithelia (LAE) and Small airway epithelial (SAE) samples of non-smokers and smokers, and Bci-NS1.1 (LAE), and hSABCi-NS1.1 (SAE) cell lines                                                                                                     | ACE2 expression: microarray, RNA-seq, single-cell RNA-seq<br>miRNA expression data: Wang <i>et al.</i> , 2015 (Wang <i>et al.</i> , 2015)                                                                                                                                                                                                                                                                                                                                                                                                                                                                                                                                                                                              |
| 26 | ACE2 and TMPRSS2 gene sequences                                                                                                                                                                                                                               | Target prediction: miRbase, miRanda, TargetScan and miRWalk                                                                                                                                                                                                                                                                                                                                                                                                                                                                                                                                                                                                                                                                            |

|    |                                                                                                                                                                                             |                                                                                                                                                                                                                                                                                                                                                                                                      |
|----|---------------------------------------------------------------------------------------------------------------------------------------------------------------------------------------------|------------------------------------------------------------------------------------------------------------------------------------------------------------------------------------------------------------------------------------------------------------------------------------------------------------------------------------------------------------------------------------------------------|
| 27 | Normal colon tissue samples retrieved from the TCGA database (TCGA-COAD)                                                                                                                    | miRNA and RNA sequencing: NGS sequencing<br>Potential regulatory interactions: Spearman correlation                                                                                                                                                                                                                                                                                                  |
| 28 | Paired RNA-seq/miRNA-seq data from TCGA-BLCA, TCGA-BRCA, TCGA-COAD, TCGA-ESCA, TCGA-KICH, TCGA-KIRC, TCGA-KIRP, TCGA-LIHC, TCGA-LUAD, TCGA-LUSC, TCGA-PRAD, TCGA-UCEC                       | Isomir/miRNA analysis: TargetScan<br>Protein-miRNA regulatory interactions: TransmiR v2.0<br>Single-cell RNA sequencing data                                                                                                                                                                                                                                                                         |
| 29 | <i>TMPRSS2</i> sequence obtained from Ensembl<br><i>TMPRSS2</i> tissue-specific expression levels: Gtex<br><i>TMPRSS2</i> aminoacid sequence: ExPASy2<br>RNA expression levels: GEPIA, CCLE | Prediction of functional consequences of SNPs: SIFT, POLYPHEN-2, PROVEAN, SNAP2, HSF<br>Prediction of molecular effects of <i>TMPRSS2</i> related-SNPS on protein secondary and tertiary structures: Phyre2<br>Prediction of post-translational modifications: Modpred<br>Functional impact of SNPs on secretory characteristics: Phobius<br>Influence of SNPs on miRNA function: PolymiRTS, miRSNPs |
